# Supplementary material
Source: Springer Nature journal article supplement (https://www.springermedizin.de/resource/supplementary/12889_2011_3252_MOESM1_ESM.pdf/9488376)

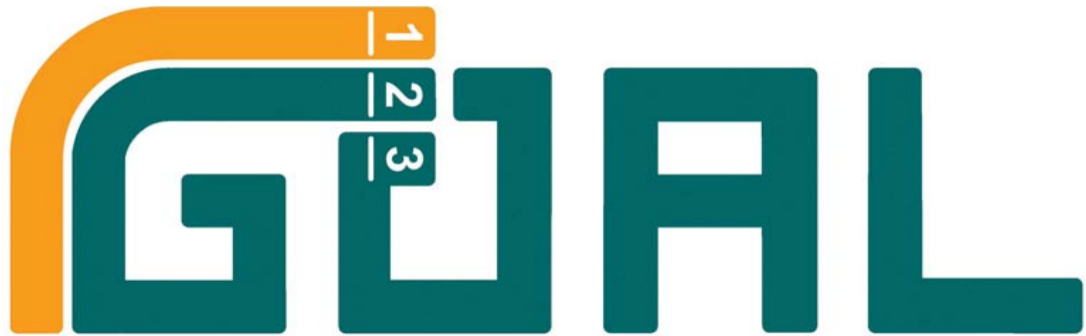

The German Young Olympic  
Athletes' Lifestyle and  
Health Management Study

Supplement: MOESM1 [file 9488376]
